# Supplementary material for: Isolation and bioactivities of a non-sericin component from cocoon shell silk sericin of the silkworm Bombyx mori
Source: Royal Society of Chemistry journal article supplement (doi:10.1039/c1fo10148j), 2011-11-21
Supplement: c1fo10148j.pdf [file c1fo10148j.pdf]

Electronic Supplementary Information

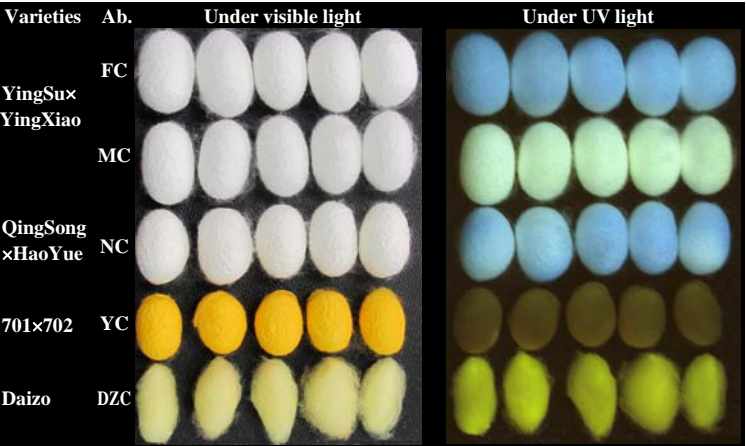

The bioactivities of the non-sericin component of the silkworm cocoon outer layer were much higher than those of sericin alone, regardless of the source of the silkworm cocoon.
